# Supplementary material for: Calculation of excited states of monolayer TPPA-COF based on first principles
Source: Royal Society of Chemistry journal article supplement (doi:10.1039/d3cp00578j), 2023-01-01
Supplement: d3cp00578j1.pdf [file d3cp00578j1.pdf]

## Supporting information

### Calculation of excited states of monolayer TPPA-COF based on First-principles

*Xudong Tang*<sup>d,†</sup>, *Yani Liu*<sup>b,†</sup>, *Mingyang Li*<sup>a, e</sup>, *Wangyang Ding*<sup>c</sup>, *Haihua Chen*<sup>c</sup>, *Wenjuan Wei*<sup>a,c,\*</sup>, and *Jiayu Li*<sup>c,\*</sup>

<sup>a</sup>*Department of Chemistry, Tsinghua University, Beijing 100084, China. E-mail: [wwenjuan20@163.com](mailto:wwenjuan20@163.com)*

<sup>b</sup>*Key Laboratory of Water Pollution Control Technology, Hunan Research Academy of Environmental Sciences, Changsha 410004, China.*

<sup>c</sup>*Center on Nanoenergy Research, School of Physical Science and Technology, Guangxi University, Nanning, Guangxi 530004, P.R. China. E-mail: [lijiaayu12041@163.com](mailto:lijiaayu12041@163.com)*

<sup>d</sup>*Guangxi University of Science and Technology, Liuzhou, Guangxi, 545006*

<sup>e</sup>*Nanjing University, Nanjing, Jiangsu 21000P.R.China*

<sup>†</sup>*These authors contribute equally.*

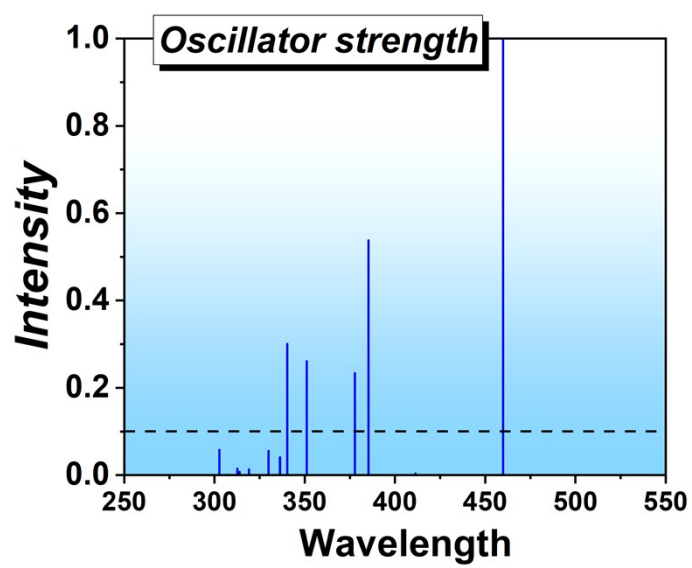

S1. The oscillator strength of TPPA-COF monolayer.

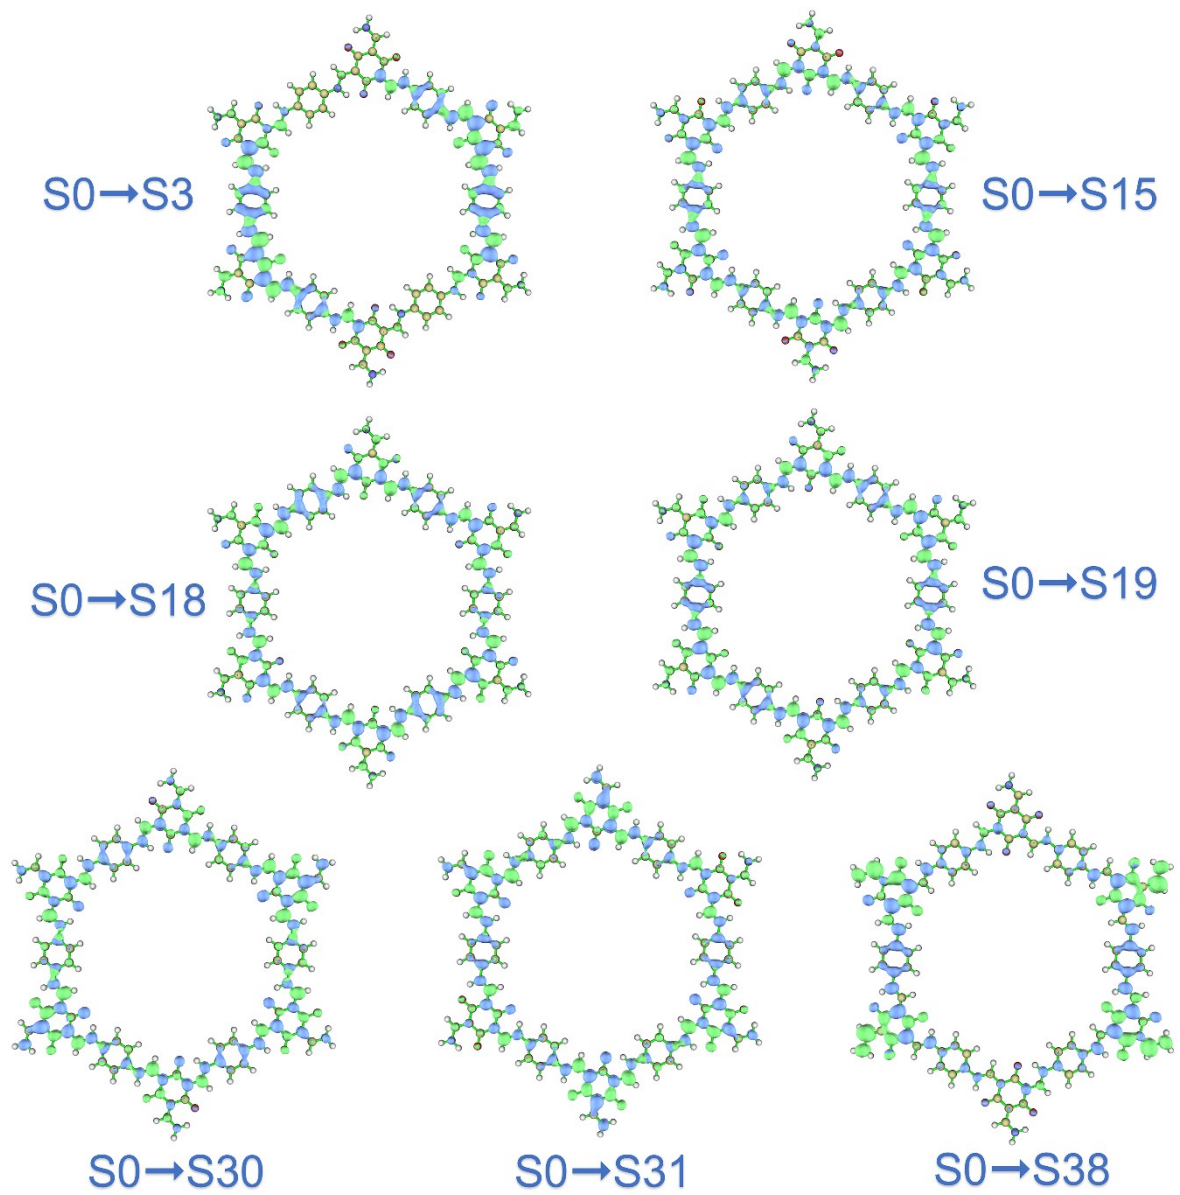

**S2.** Electron-hole distribution of excitations  $S_0 \rightarrow S_3$ ,  $S_0 \rightarrow S_{15}$ ,  $S_0 \rightarrow S_{18}$ ,  $S_0 \rightarrow S_{19}$ ,  $S_0 \rightarrow S_{30}$ ,  $S_0 \rightarrow S_{31}$  and  $S_0 \rightarrow S_{38}$  of TPPA-COF monolayer.

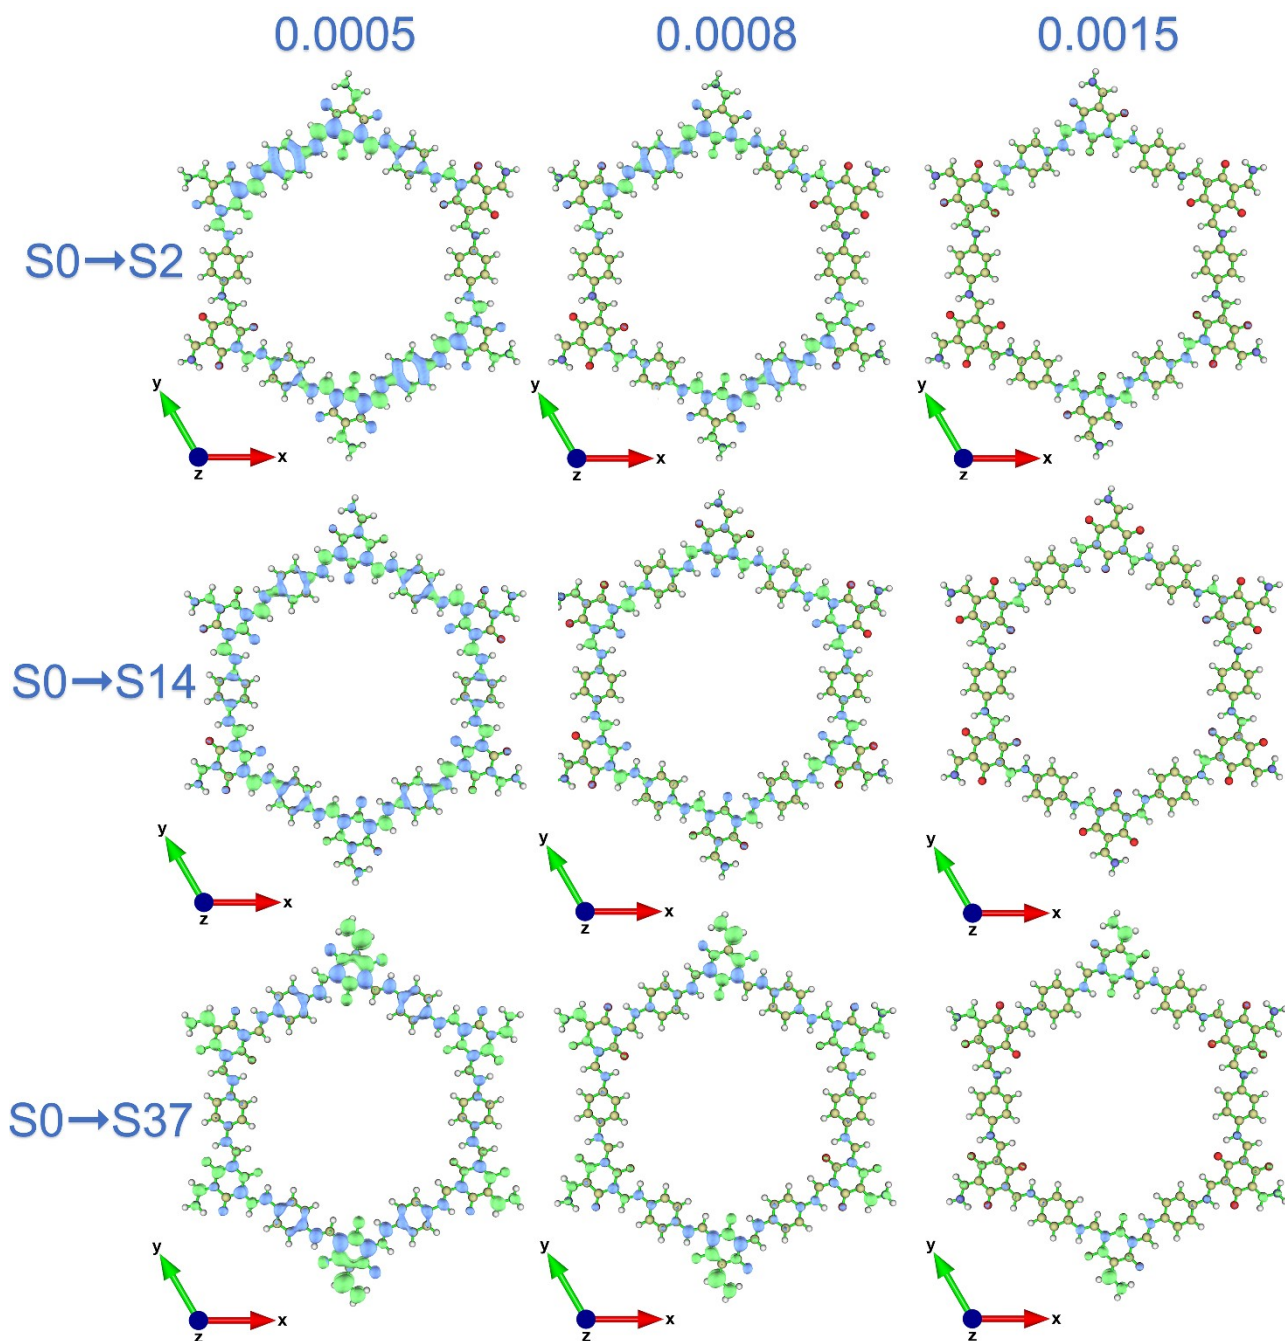

**S3.** Excitations  $S_0 \rightarrow S_2$ ,  $S_0 \rightarrow S_{14}$  and  $S_0 \rightarrow S_{37}$  electron hole distributions under different isosurface (0.0005, 0.0008 and 0.0015).

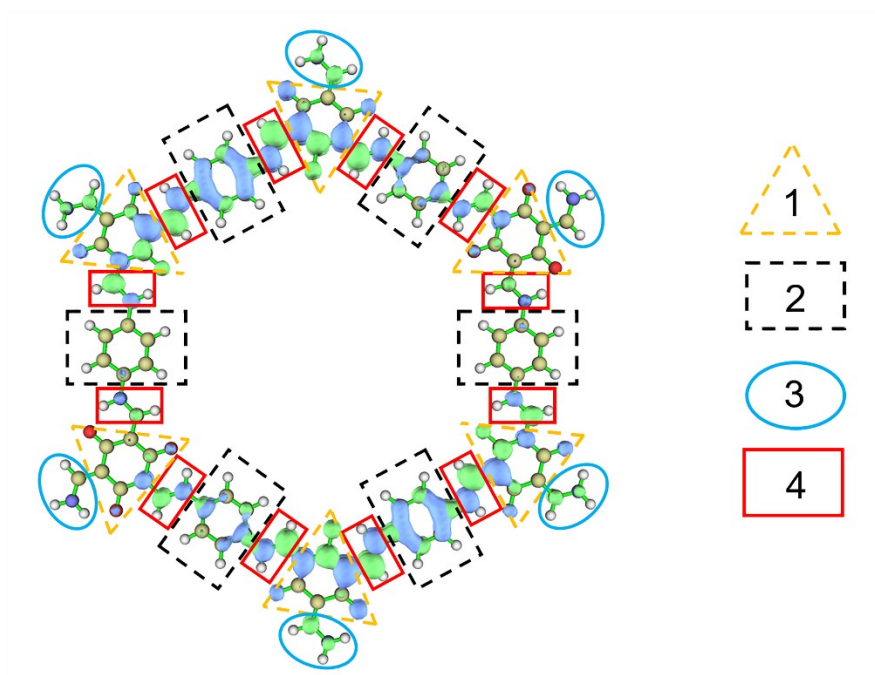

S4. The fragments definition diagram of the TPPA-COF monolayer.

**Table S1.** Excitation energy, corresponding wavelength for light absorption, and relevant orbital contribution of each excited state of TPPA-COF monolayer.

| Materital                   | TPPA-COF |          |          |          |          |          |          |          |           |           |
|-----------------------------|----------|----------|----------|----------|----------|----------|----------|----------|-----------|-----------|
| The excitation energy       | #2       | #3       | #14      | #15      | #18      | #19      | #30      | #31      | #37       | #38       |
| The Excitation energy/eV    | 2.6956   | 2.6963   | 3.2175   | 3.2176   | 3.2814   | 3.2816   | 3.5307   | 3.5310   | 3.6430    | 3.6434    |
| Corresponding wavelength/nm | 459.95   | 459.83   | 385.34   | 385.33   | 377.84   | 377.82   | 351.16   | 351.13   | 340.34    | 340.30    |
| Orbital contribution        | H-1-> L  | H-2-> L  | H-3->L+1 | H-4->L+1 | H-1->L+4 | H-1->L+3 | H-5->L+4 | H-5->L+3 | H->L+9    | H->L+10   |
|                             | 43.5%    | 43.4%    | 22.8%    | 22.8%    | 34.5%    | 34.6%    | 26.7%    | 26.7%    | 22.6%     | 22.5%     |
|                             | H->L+1   | H->L+2   | H-4->L+2 | H-3->L+2 | H2->L+3  | H-2->L+4 | H-4->L+5 | H-3->L+5 | H-1->L+11 | H-2->L+11 |
|                             | 37.8%    | 37.8%    | 22.8%    | 22.70%   | 33.50%   | 33.4%    | 19.80%   | 19.80%   | 13.3%     | 13.1%     |
|                             |          |          | H-17->L  | H-2-> L  | H->L+1   | H->L+2   | H-5->L+3 | H-5->L+4 | H->L+10   | H->L+9    |
|                             |          |          | 13.7%    | 11.0%    | 10.90%   | 10.9%    | 18.7%    | 18.70%   | 9.30%     | 9.20%     |
|                             |          |          | H-4->L+1 | H-4->L+2 |          |          |          |          | H-2->L+7  | H-2->L+8  |
|                             |          | 11.1%    | 10.90%   |          |          |          |          | 8.90%    | 8.90%     |           |
|                             |          | H-3->L+2 | H-5->L+4 |          |          |          |          | H-1->L+8 | H-1->L+7  |           |
|                             |          | 10.8%    | 7.2%     |          |          |          |          |          | 8.9%      | 8.80%     |
|                             |          | H-5->L+3 |          |          |          |          |          |          |           |           |
|                             |          | 7.2%     |          |          |          |          |          |          |           |           |

**Table S2.** Some theoretically evaluated parameters attained from electron-hole method for excited states of TPPA-COF monolayer.

| Type     | N0 | Excitation energy | Sm index | Sr index | D index  | t index  | H index  | Hole delocalization index | Electron delocalization index |
|----------|----|-------------------|----------|----------|----------|----------|----------|---------------------------|-------------------------------|
| □        | □  | eV                | a.u.     | a.u.     | Angstrom | Angstrom | Angstrom | /                         | /                             |
| TPPA-COF | 2  | 2.69              | 0.39     | 0.68     | 0.002    | -8.696   | 12.226   | 3.43                      | 3.06                          |
|          | 3  | 2.69              | 0.39     | 0.68     | 0.004    | -8.691   | 12.267   | 3.44                      | 3.05                          |
|          | 14 | 3.22              | 0.46     | 0.74     | 0.002    | -8.732   | 12.396   | 2.71                      | 2.65                          |
|          | 15 | 3.22              | 0.46     | 0.74     | 0.001    | -8.640   | 12.396   | 2.71                      | 2.65                          |
|          | 18 | 3.28              | 0.47     | 0.75     | 0.002    | -8.780   | 12.405   | 2.89                      | 2.53                          |
|          | 19 | 3.28              | 0.47     | 0.75     | 0.002    | -8.640   | 12.405   | 2.89                      | 2.53                          |
|          | 30 | 3.53              | 0.43     | 0.73     | 0.004    | -8.888   | 12.590   | 2.75                      | 2.66                          |
|          | 31 | 3.53              | 0.43     | 0.73     | 0.003    | -8.943   | 12.589   | 2.76                      | 2.65                          |
|          | 37 | 3.64              | 0.31     | 0.62     | 0.004    | -9.594   | 13.328   | 3.00                      | 3.91                          |
|          | 38 | 3.64              | 0.31     | 0.62     | 0.006    | -8.559   | 13.326   | 3.00                      | 3.91                          |
